# Supplementary material
Source: PubMed Central journal article supplement (PMC3503235)
Supplement: 1210239109_pnas.201210239SI.pdf [file 1210239109_pnas.201210239SI.pdf]

# Supporting Information

Luo et al. 10.1073/pnas.1210239109

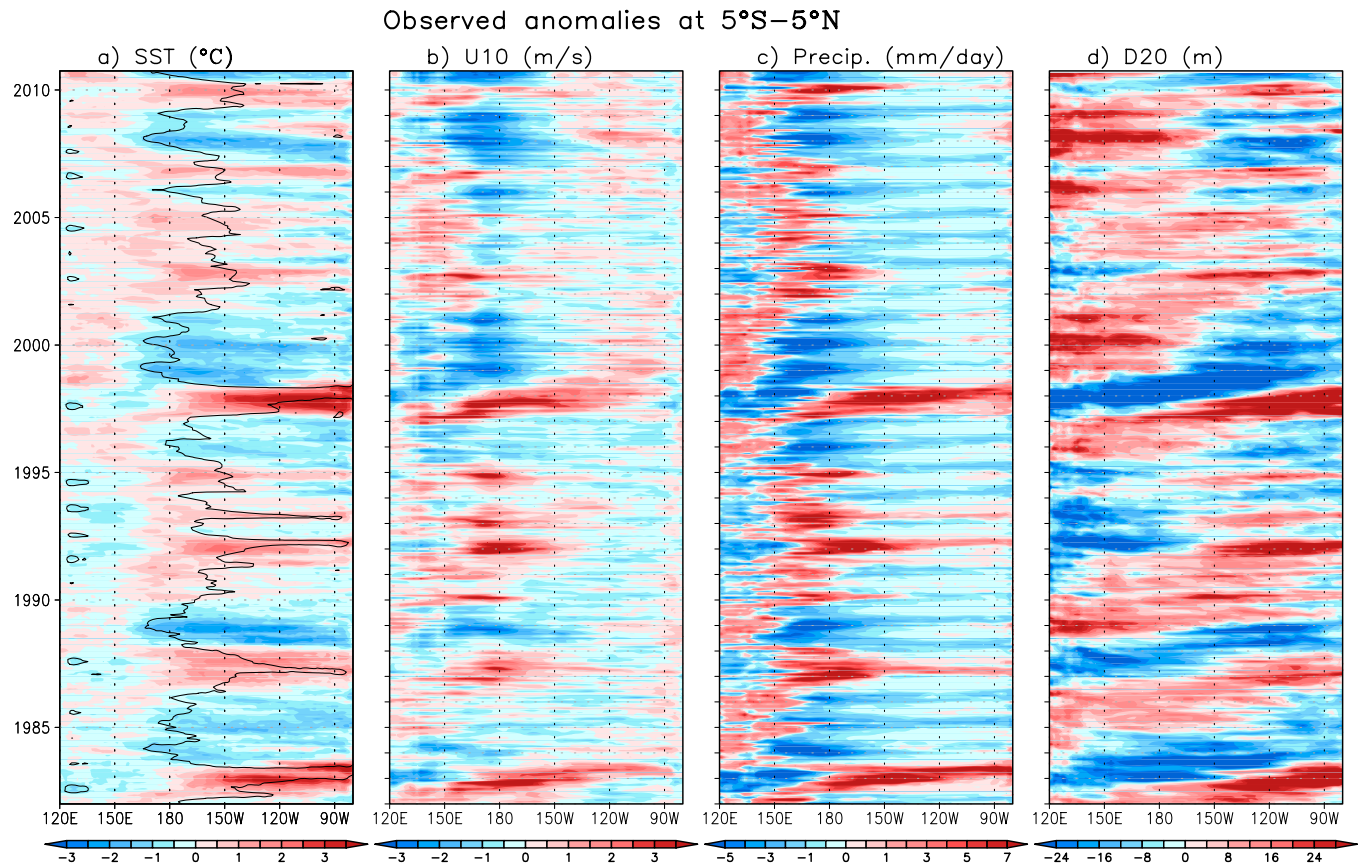

**Fig. S1.** Changing El Niño behaviors in the 2000s. Shown are observed sea surface temperature (SST), zonal surface wind, precipitation, and ocean 20 °C isotherm depth anomalies (relative to the climatology of 1983–2006) in the equatorial Pacific (5°S–5°N) during 1982–2010. The solid line in A denotes the 28 °C isotherm of SST.





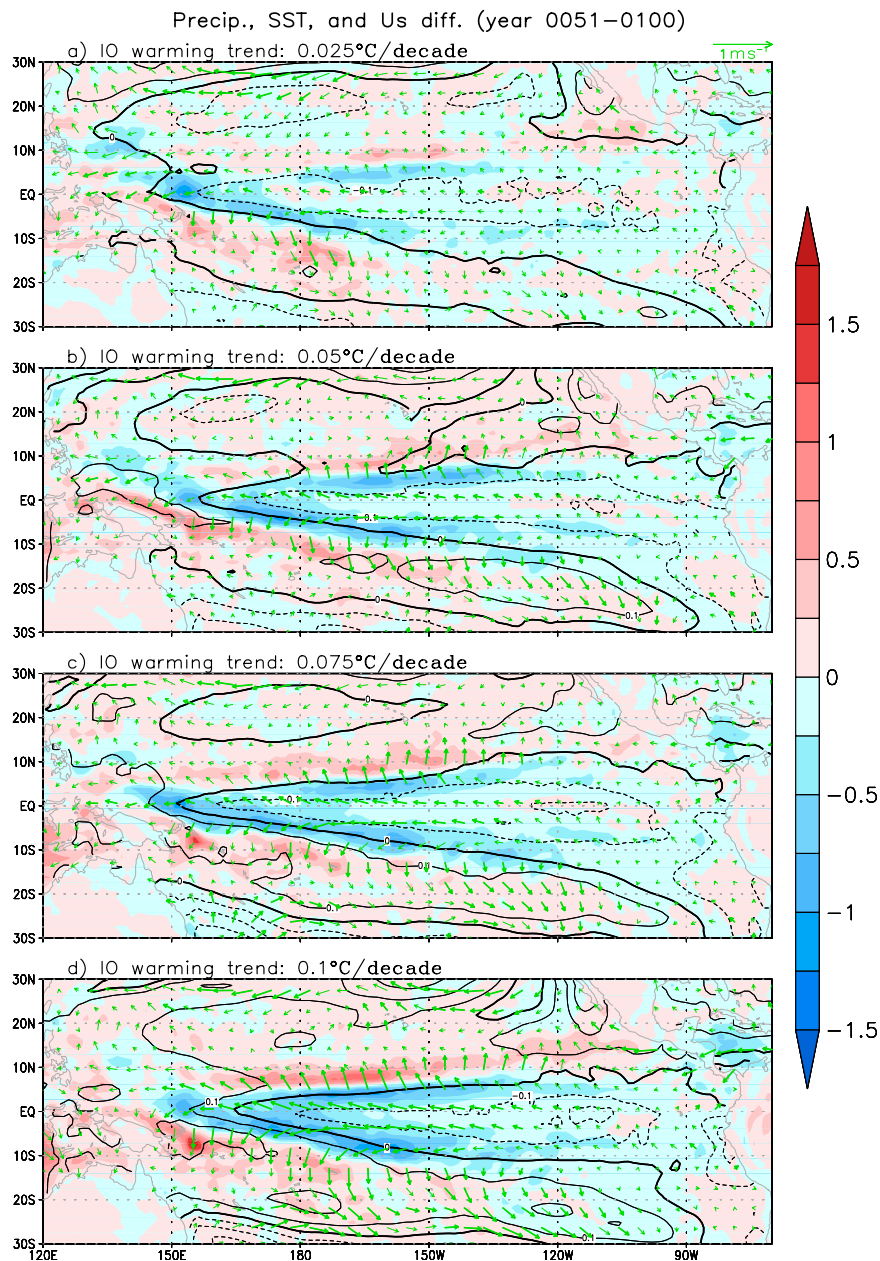

**Fig. S5.** Influence of multidecadal IO warming on the Pacific, according to climate model experiments. Shown are 50-y mean differences of SST (contour), surface winds (thick vectors denote  $\leq 10\%$  significance according to two-tailed Student  $t$  test), and precipitation (mm/d, color scaled) between the model sensitivity experiments and control run. In the control run, model climatological SST is prescribed in the tropical IO but with free ocean–atmosphere coupling elsewhere. In the sensitivity experiments, four linear warming trends (0.025, 0.05, 0.075, and 0.1 °C per decade, relative to the Pacific’s) are added in the tropical IO.







Pacific wind and Pac-IO SST contrast (20th Century reanalysis)

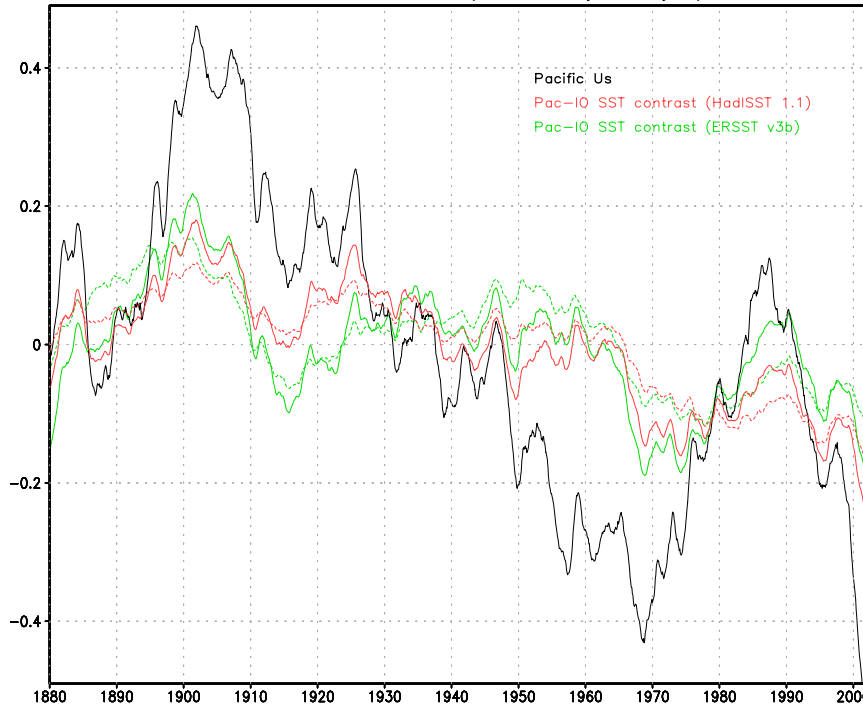

**Fig. 58.** Observed Pacific wind and Pacific-minus-IO SST difference in the 20th century. Shown are 15-y running mean anomalies (relative to the 1900–1999 climatology) of SST difference between the tropical eastern Pacific and IO (red solid line), SST difference between the tropical Pacific and IO (red dashed line), and Pacific zonal wind (black line) from the 20th century atmospheric reanalysis ([www.esrl.noaa.gov/psd/data/gridded/data.20thC\\_ReanV2.html](http://www.esrl.noaa.gov/psd/data/gridded/data.20thC_ReanV2.html)). The SST forcing is from Hadley Centre Sea Ice and Sea Surface Temperature data set (HadISST) 1.1 ([badc.nerc.ac.uk/data/hadisst/](http://badc.nerc.ac.uk/data/hadisst/)). Results based on Extended Reconstructed Sea Surface Temperature (ERSST) v3b analysis are also shown (green lines). We note that data quality before early 1980s might be low owing to sparse in situ measurements ([icoads.noaa.gov/r2.5.html](http://icoads.noaa.gov/r2.5.html)).







**Table S1. World Climate Research Programme CMIP3 models for each scenario experiment adopted in this analysis**

| Model             | 20C3M | SRESB1 | SRESA1B | SRESA2 | Commit | picntrl |
|-------------------|-------|--------|---------|--------|--------|---------|
| BCCR BCM2.0       | Y     | Y      | Y       | Y      | Y      |         |
| CCCMA_CGCM3.1 T47 | Y     | Y      | Y       | Y      |        | Y       |
| CCCMA_CGCM3.1 T63 | Y     | Y      | Y       |        |        | Y       |
| CNRM CM3          | Y     | Y      | Y       | Y      | Y      | Y       |
| CSIRO Mk3_5       | Y     | Y      | Y       | Y      | Y      | Y       |
| GFDL CM2.0        | Y     | Y      | Y       | Y      | Y      | Y       |
| GFDL CM2.1        | Y     | Y      | Y       | Y      | Y      | Y       |
| GISS AOM          | Y     | Y      | Y       |        |        |         |
| GISS-EH           | Y     |        | Y       |        |        | Y       |
| GISS-ER           | Y     | Y      | Y       | Y      | Y      | Y       |
| IAP FGOALS        | Y     | Y      | Y       |        | Y      | Y       |
| INM CM3.0         | Y     | Y      | Y       | Y      | Y      | Y       |
| IPSL CM4          | Y     | Y      | Y       | Y      | Y      | Y       |
| MIROC Hires       | Y     | Y      | Y       |        |        |         |
| MIROC Medres      | Y     | Y      | Y       | Y      | Y      | Y       |
| MIUB ECHO-G       | Y     | Y      | Y       | Y      | Y      | Y       |
| MPI ECHAM5        | Y     | Y      | Y       | Y      |        |         |
| MRI CGCM2.3a      | Y     | Y      | Y       | Y      | Y      | Y       |
| U.K.MO HadCM3     | Y     | Y      | Y       | Y      | Y      | Y       |
| U.K.MO HadGem1    | Y     |        | Y       | Y      |        |         |
| Total             | 20    | 18     | 20      | 15     | 13     | 15      |

Detailed information on each model and experiment is available on <https://esg.llnl.gov:8443/>.

**Table S2. World Climate Research Programme CMIP5 models for each scenario experiment adopted in this analysis**

| Model          | Historical | RCP45 | RCP60 | RCP85 | RCP26 | piControl |
|----------------|------------|-------|-------|-------|-------|-----------|
| BCC-CSM1-1     | Y          | Y     | Y     | Y     | Y     | Y         |
| CANESM2        | Y          | Y     |       | Y     | Y     | Y         |
| CNRM-CM5       | Y          | Y     |       | Y     | Y     | Y         |
| CSIRO-MK3-6-0  | Y          | Y     | Y     | Y     | Y     |           |
| GFDL-ESM2G     | Y          | Y     |       |       | Y     | Y         |
| GFDL-ESM2M     | Y          |       |       |       |       | Y         |
| GISS-E2-H      | Y          |       |       |       |       | Y         |
| GISS-E2-R      | Y          | Y     | Y     | Y     |       | Y         |
| HADCM3         | Y          |       |       |       |       |           |
| HADGEM2-CC     | Y          | Y     |       | Y     |       |           |
| HADGEM2-ES     | Y          | Y     | Y     | Y     | Y     | Y         |
| INMCM4         | Y          | Y     |       | Y     |       | Y         |
| IPSL-CM5A-LR   | Y          | Y     | Y     | Y     | Y     | Y         |
| IPSL-CM5A-MR   | Y          | Y     |       | Y     | Y     |           |
| MIROC-ESM      | Y          | Y     | Y     | Y     | Y     | Y         |
| MIROC-ESM-CHEM | Y          | Y     | Y     | Y     | Y     |           |
| MIROC5         | Y          | Y     | Y     | Y     | Y     | Y         |
| MPI-ESM-LR     | Y          | Y     |       | Y     | Y     | Y         |
| MRI-CGCM3      | Y          | Y     | Y     | Y     | Y     | Y         |
| NORESM1-M      | Y          | Y     | Y     | Y     | Y     | Y         |
| Total          | 20         | 17    | 10    | 16    | 14    | 15        |

Detailed information on each model and experiment is available on <http://pcmdi3.llnl.gov/esgset/home.htm/>.
